# Supplementary material for: Advances in implants and bone graft types for lumbar spinal fusion surgery
Source: Royal Society of Chemistry journal article supplement (doi:10.1039/d4bm00848k), 2024-01-01
Supplement: d4bm00848k1.pdf [file d4bm00848k1.pdf]

# Supplement

## Advances in implants and bone graft types for lumbar spinal fusion surgery

Giles M. Cheers <sup>1,\*</sup>, Lucas P. Weimer <sup>1</sup>, Carl Neuerburg <sup>1</sup>, Jörg Arnholdt <sup>1</sup>, Fabian Gilbert <sup>1</sup>, Christoph Thorwächter <sup>1</sup>, Boris M. Holzapfel <sup>1</sup>, Susanne Mayer-Wagner <sup>1</sup>, Markus Laubach <sup>1,2,\*</sup>

<sup>1</sup> Department of Orthopaedics and Trauma Surgery, Musculoskeletal University Center Munich (MUM), LMU University Hospital, LMU Munich, Marchioninistraße 15, 81377 Munich, Germany

<sup>2</sup> Australian Research Council (ARC) Training Centre for Multiscale 3D Imaging, Modelling and Manufacturing (M3D Innovation), Queensland University of Technology, Brisbane, QLD 4000, Australia

\* corresponding authors. Giles.Cheers@med.uni-muenchen.de, Markus.Laubach@med.uni-muenchen.de

**Supplement 1. Representative image of an autologous bone dust collector.**

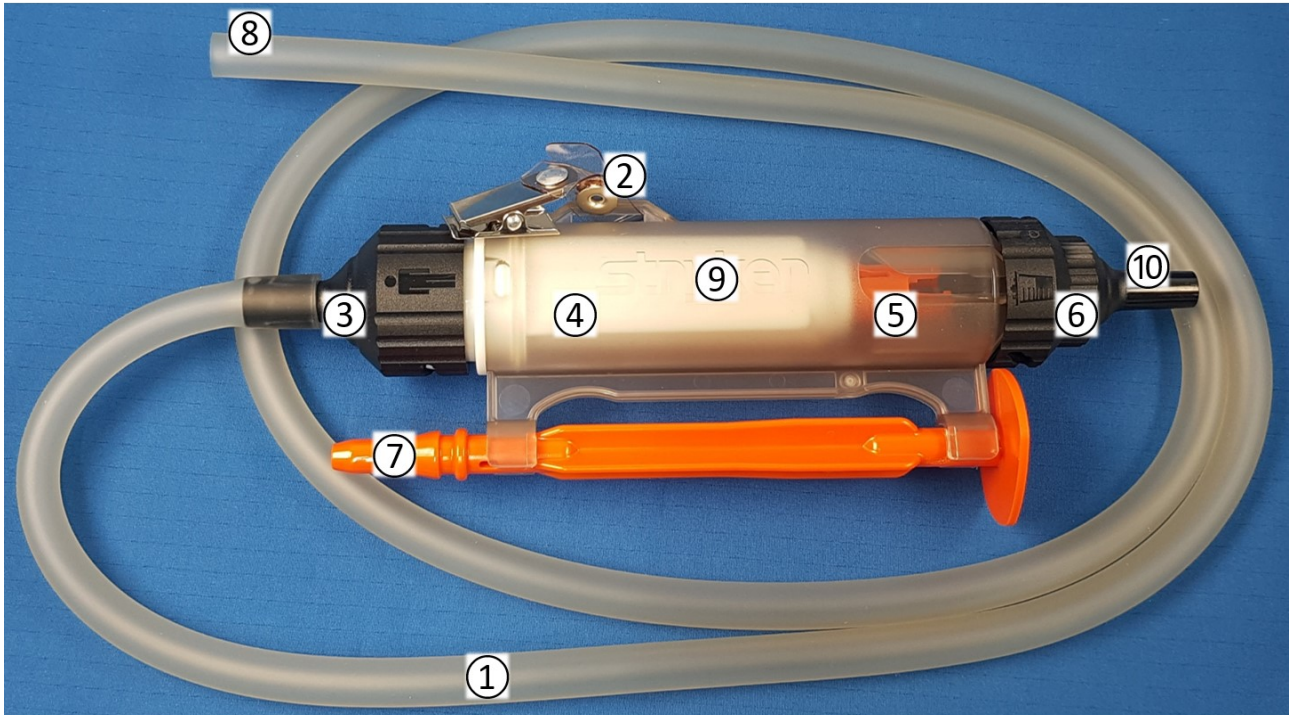

Key: 1 = inlet tubing, 2 = drape clip, 3 = inlet cap, 4 = device body, 5 = piston, 6 = outlet cap, 7 = plunger, 8 = inlet tube opening for connection to surgical suction tip, 9 = bone material filter, 10 = outlet site for connection to waste management system. Bone Vac was kindly provided by Stryker.
